# Supplementary material
Source: PubMed Central journal article supplement (PMC8992663)
Supplement: NIHMS1793360-supplement-Supplementary_Material.pdf [file NIHMS1793360-supplement-Supplementary_Material.pdf]

**Data Supplement**

**Fradley et al**

**Recognition, Prevention, and Management of Arrhythmias and Autonomic Disorders in Cardio-Oncology: A Scientific Statement From the American Heart Association**

**Table I: Relevant Arrhythmia and Cancer Therapeutic Drug-Drug Interactions**

| Cancer Therapy | Malignancies Treated          | Arrhythmia Therapy                                                                                                                                                                                                                                              | Mechanism                                                                                    | Effect                                                                                                                      |
|----------------|-------------------------------|-----------------------------------------------------------------------------------------------------------------------------------------------------------------------------------------------------------------------------------------------------------------|----------------------------------------------------------------------------------------------|-----------------------------------------------------------------------------------------------------------------------------|
| Abiraterone    | Metastatic prostate cancer    | <p>Rate Control</p> <ul style="list-style-type: none"> <li>• Carvedilol</li> <li>• Metoprolol</li> <li>• Propranolol</li> </ul> <p>Rhythm Control</p> <ul style="list-style-type: none"> <li>• Flecainide</li> <li>• Propafenone</li> </ul>                     | <ul style="list-style-type: none"> <li>• Unknown</li> <li>• CYP 2D6 inhibition</li> </ul>    | <ul style="list-style-type: none"> <li>• [↑] beta blocker/bradycardic effect</li> <li>• [↑] antiarrhythmic drugs</li> </ul> |
| Afatinib       | NSCLC                         | <p>Rate Control</p> <ul style="list-style-type: none"> <li>• Carvedilol</li> <li>• Verapamil</li> </ul> <p>Rhythm Control</p> <ul style="list-style-type: none"> <li>• Quinidine</li> <li>• Propafenone</li> <li>• Amiodarone</li> <li>• Dronedarone</li> </ul> | <ul style="list-style-type: none"> <li>• Pgp inhibition</li> <li>• Pgp inhibition</li> </ul> | <ul style="list-style-type: none"> <li>• [↑] afatinib</li> <li>• [↑] afatinib</li> </ul>                                    |
| Axitinib       | Advanced Renal Cell Carcinoma | <p>Rate Control</p> <ul style="list-style-type: none"> <li>• Non-dihydropyridine CCB</li> </ul> <p>Rhythm Control</p> <ul style="list-style-type: none"> <li>• Dronedarone</li> </ul>                                                                           | <ul style="list-style-type: none"> <li>• CYP 3A4 inhibition</li> </ul>                       | <ul style="list-style-type: none"> <li>• [↑] axitinib</li> <li>• [↑] axitinib</li> </ul>                                    |

Data Supplement

Fradley et al Recognition, Prevention, and Management of Arrhythmias and Autonomic Disorders in Cardio-Oncology: A Scientific Statement From the American Heart Association

|                                             |                                   |                                                                                                                                                                                                                                          |                                                                                                      |                                                                                                                               |
|---------------------------------------------|-----------------------------------|------------------------------------------------------------------------------------------------------------------------------------------------------------------------------------------------------------------------------------------|------------------------------------------------------------------------------------------------------|-------------------------------------------------------------------------------------------------------------------------------|
|                                             |                                   |                                                                                                                                                                                                                                          | <ul style="list-style-type: none"> <li>• CYP 3A4 inhibition</li> </ul>                               |                                                                                                                               |
| Bosutinib                                   | CML                               | <p>Rate Control</p> <ul style="list-style-type: none"> <li>• Non-dihydropyridine CCB</li> </ul> <p>Rhythm Control</p> <ul style="list-style-type: none"> <li>• Dronedarone</li> </ul>                                                    | <ul style="list-style-type: none"> <li>• CYP 3A4 inhibition</li> <li>• CYP 3A4 inhibition</li> </ul> | <ul style="list-style-type: none"> <li>• [↑] bosutinib</li> <li>• [↑] bosutinib</li> </ul>                                    |
| Brentuximab vendotin                        | Hodgkin's and other lymphomas     | <p>Rate Control</p> <ul style="list-style-type: none"> <li>• Carvedilol</li> <li>• Verapamil</li> </ul> <p>Rhythm Control</p> <ul style="list-style-type: none"> <li>• Quinidine</li> <li>• Propafenone</li> <li>• Amiodarone</li> </ul> | <ul style="list-style-type: none"> <li>• Pgp inhibition</li> <li>• Pgp inhibition</li> </ul>         | <ul style="list-style-type: none"> <li>• [↑] brentuximab</li> <li>• [↑] brentuximab</li> </ul>                                |
| BTK Inhibitors (ibrutinib and acalbrutinib) | CLL and other B cell malignancies | <p>Rate Control</p> <ul style="list-style-type: none"> <li>• Non-dihydropyridine CCB</li> <li>• Digoxin</li> </ul> <p>Rhythm Control</p> <ul style="list-style-type: none"> <li>• Dronedarone</li> </ul>                                 | <ul style="list-style-type: none"> <li>• CYP 3A4 inhibition</li> <li>• Pgp inhibition</li> </ul>     | <ul style="list-style-type: none"> <li>• [↑] BTK inhibitors</li> <li>• [↑] ibrutinib</li> <li>• [↑] BTK inhibitors</li> </ul> |

Data Supplement

Fradley et al Recognition, Prevention, and Management of Arrhythmias and Autonomic Disorders in Cardio-Oncology: A Scientific Statement From the American Heart Association

|                                                                     |                                                                |                                                                                                                                                                                                                                   |                                                                                                                                                                                                          |                                                                                                                                                |
|---------------------------------------------------------------------|----------------------------------------------------------------|-----------------------------------------------------------------------------------------------------------------------------------------------------------------------------------------------------------------------------------|----------------------------------------------------------------------------------------------------------------------------------------------------------------------------------------------------------|------------------------------------------------------------------------------------------------------------------------------------------------|
|                                                                     |                                                                | <p>Anticoagulants</p> <ul style="list-style-type: none"> <li>• Factor Xa Inhibitors</li> <li>• Direct Thrombin Inhibitor</li> <li>• Warfarin</li> </ul>                                                                           | <ul style="list-style-type: none"> <li>• CYP 3A4 inhibition</li> <li>• Inhibition of multiple clotting pathways</li> <li>• Pgp inhibition</li> <li>• Inhibition of multiple clotting pathways</li> </ul> | <ul style="list-style-type: none"> <li>• ↑ anticoagulant effect</li> <li>• ↑ anticoagulant effect</li> <li>• ↑ anticoagulant effect</li> </ul> |
| <p>CDK 4/6 Inhibitors (abemaciclib, palbociclib and ribociclib)</p> | <p>Hormone receptor positive, HER2 negative breast cancer)</p> | <p>Rate Control</p> <ul style="list-style-type: none"> <li>• Non-dihydropyridine CCB</li> </ul> <p>Rhythm Control</p> <ul style="list-style-type: none"> <li>• Disopyramide</li> <li>• Quinidine</li> <li>• Amiodarone</li> </ul> | <ul style="list-style-type: none"> <li>• CYP 3A4 inhibition</li> <li>• CYP 3A4 inhibition</li> </ul>                                                                                                     | <ul style="list-style-type: none"> <li>• [↑] abemaciclib</li> <li>• [↑]rhythm controlling medications; [↑] abemaciclib</li> </ul>              |
| <p>Ceritinib</p>                                                    | <p>NSCLC</p>                                                   | <p>Rate Control</p>                                                                                                                                                                                                               | <ul style="list-style-type: none"> <li>• Unknown</li> </ul>                                                                                                                                              | <ul style="list-style-type: none"> <li>• ↑ bradycardic effect</li> </ul>                                                                       |

Data Supplement

Fradley et al Recognition, Prevention, and Management of Arrhythmias and Autonomic Disorders in Cardio-Oncology: A Scientific Statement From the American Heart Association

|             |                   |                                                                                                                                                                                                                                                                                               |                                                                                                  |                                                                                                        |
|-------------|-------------------|-----------------------------------------------------------------------------------------------------------------------------------------------------------------------------------------------------------------------------------------------------------------------------------------------|--------------------------------------------------------------------------------------------------|--------------------------------------------------------------------------------------------------------|
|             |                   | <ul style="list-style-type: none"> <li>Beta blockers</li> <li>Non-dihydropyridine CCB</li> <li>Digoxin</li> </ul> <p>Rhythm Control</p> <ul style="list-style-type: none"> <li>Amiodarone; Sotalol</li> </ul> <p>Anticoagulant</p> <ul style="list-style-type: none"> <li>Warfarin</li> </ul> | <ul style="list-style-type: none"> <li>Unknown</li> <li>CYP 2C9 inhibition</li> </ul>            | <ul style="list-style-type: none"> <li>↑ bradycardic effect</li> <li>↑ anticoagulant effect</li> </ul> |
| Cobimetinib | Advanced melanoma | <p>Rate Control</p> <ul style="list-style-type: none"> <li>Non-dihydropyridine CCB</li> </ul> <p>Rhythm Control</p> <ul style="list-style-type: none"> <li>Dronedarone</li> </ul>                                                                                                             | <ul style="list-style-type: none"> <li>CYP 3A4 inhibition</li> <li>CYP 3A4 inhibition</li> </ul> | <ul style="list-style-type: none"> <li>[↑] cobimetinib</li> <li>[↑] cobimetinib</li> </ul>             |
| Crizotinib  | NSCLC             | <p>Rate Control</p> <ul style="list-style-type: none"> <li>Beta blockers</li> <li>Digoxin</li> </ul> <ul style="list-style-type: none"> <li>Non-dihydropyridine CCB</li> </ul>                                                                                                                | <ul style="list-style-type: none"> <li>Unknown</li> <li>CYP 3A4 Inhibition</li> </ul>            | <ul style="list-style-type: none"> <li>↑ bradycardic effect</li> <li>[↑] crizotinib</li> </ul>         |

Data Supplement

Fradley et al Recognition, Prevention, and Management of Arrhythmias and Autonomic Disorders in Cardio-Oncology: A Scientific Statement From the American Heart Association

|                                                                      |            |                                                                                                                                                                                                                                                                                                                                                                                                                                                   |                                                                                                                                                                               |                                                                                                                                                                                                            |
|----------------------------------------------------------------------|------------|---------------------------------------------------------------------------------------------------------------------------------------------------------------------------------------------------------------------------------------------------------------------------------------------------------------------------------------------------------------------------------------------------------------------------------------------------|-------------------------------------------------------------------------------------------------------------------------------------------------------------------------------|------------------------------------------------------------------------------------------------------------------------------------------------------------------------------------------------------------|
|                                                                      |            | <p>Rhythm Control</p> <ul style="list-style-type: none"> <li>• Amiodarone</li> <li>• Sotalol</li> </ul>                                                                                                                                                                                                                                                                                                                                           | <ul style="list-style-type: none"> <li>• Unknown</li> </ul>                                                                                                                   | <ul style="list-style-type: none"> <li>• ↑ bradycardic effect</li> </ul>                                                                                                                                   |
| <p>Dabrafenib<br/>(BRAF inhibitor<br/>for advanced<br/>melanoma)</p> |            | <p>Rate Control</p> <ul style="list-style-type: none"> <li>• Bisoprolol;<br/>non-<br/>dihydropyridine<br/>CCB</li> </ul> <p>Rhythm Control</p> <ul style="list-style-type: none"> <li>• Disopyramide</li> <li>• Quinidine</li> <li>• Amiodarone</li> <li>• Dronedarone</li> </ul> <p>Anticoagulants</p> <ul style="list-style-type: none"> <li>• Factor Xa<br/>inhibitors</li> </ul> <ul style="list-style-type: none"> <li>• Warfarin</li> </ul> | <ul style="list-style-type: none"> <li>• CYP 3A4<br/>induction</li> <li>• CYP 3A4<br/>induction</li> <li>• CYP 3A4<br/>induction</li> <li>• CYP 2C9<br/>inhibition</li> </ul> | <ul style="list-style-type: none"> <li>• [↓] rate controlling<br/>medications</li> <li>• [↓] rhythm controlling<br/>medications</li> <li>• [↓] anticoagulants</li> <li>• ↑ anticoagulant effect</li> </ul> |
| <p>Dasatinib</p>                                                     | <p>CML</p> | <p>Anticoagulants</p> <ul style="list-style-type: none"> <li>• Factor Xa<br/>inhibitors</li> </ul>                                                                                                                                                                                                                                                                                                                                                | <ul style="list-style-type: none"> <li>• Inhibition of<br/>multiple<br/>clotting<br/>pathways</li> <li>• Inhibition of<br/>multiple</li> </ul>                                | <ul style="list-style-type: none"> <li>• ↑ anticoagulant effect</li> <li>• ↑ anticoagulant effect</li> </ul>                                                                                               |

Data Supplement

Fradley et al Recognition, Prevention, and Management of Arrhythmias and Autonomic Disorders in Cardio-Oncology: A Scientific Statement From the American Heart Association

|             |                                                        |                                                                                                                                                                                                                                                                                    |                                                                                                                                                                        |                                                                                                                       |
|-------------|--------------------------------------------------------|------------------------------------------------------------------------------------------------------------------------------------------------------------------------------------------------------------------------------------------------------------------------------------|------------------------------------------------------------------------------------------------------------------------------------------------------------------------|-----------------------------------------------------------------------------------------------------------------------|
|             |                                                        | <ul style="list-style-type: none"> <li>• Direct Thrombin Inhibitor</li> <li>• Warfarin</li> </ul>                                                                                                                                                                                  | <p>clotting pathways</p> <ul style="list-style-type: none"> <li>• Inhibition of multiple clotting pathways</li> </ul>                                                  | <ul style="list-style-type: none"> <li>• ↑ anticoagulant effect</li> </ul>                                            |
| Docetaxel   | Various cancers including breast and gastric           | <p>Rhythm Control</p> <ul style="list-style-type: none"> <li>• Dronedarone</li> </ul>                                                                                                                                                                                              | <ul style="list-style-type: none"> <li>• CYP 3A4 and Pgp inhibition</li> </ul>                                                                                         | <ul style="list-style-type: none"> <li>• [↑] docetaxel</li> </ul>                                                     |
| Doxorubicin | Various cancers including breast and leukemia/lymphoma | <p>Rate Control</p> <ul style="list-style-type: none"> <li>• Carvedilol</li> <li>• Verapamil</li> <li>• Digoxin</li> </ul> <p>Rhythm Control</p> <ul style="list-style-type: none"> <li>• Quinidine</li> <li>• Propafenone</li> <li>• Amiodarone</li> <li>• Dronedarone</li> </ul> | <ul style="list-style-type: none"> <li>• Pgp inhibition</li> <li>• Decreased oral bioavailability of digoxin; mechanism uncertain</li> <li>• Pgp inhibition</li> </ul> | <ul style="list-style-type: none"> <li>• [↑] doxorubicin</li> <li>• [↓] digoxin</li> <li>• [↑] doxorubicin</li> </ul> |
| Erdafitinib | Advanced urothelial cancer                             | <p>Rate Control</p> <ul style="list-style-type: none"> <li>• Bisoprolol</li> <li>• Non-dihydropyridine CCB</li> </ul>                                                                                                                                                              | <ul style="list-style-type: none"> <li>• CYP 3A4 induction</li> </ul>                                                                                                  | <ul style="list-style-type: none"> <li>• [↓] rate controlling medications</li> </ul>                                  |

Data Supplement

Fradley et al Recognition, Prevention, and Management of Arrhythmias and Autonomic Disorders in Cardio-Oncology: A Scientific Statement From the American Heart Association

|                |                                              |                                                                                                                                                                                                                                                                                                                                                                                                      |                                                                                                                                                                                                                                                                                                                                             |                                                                                                                                                                                                                                                                                                                       |
|----------------|----------------------------------------------|------------------------------------------------------------------------------------------------------------------------------------------------------------------------------------------------------------------------------------------------------------------------------------------------------------------------------------------------------------------------------------------------------|---------------------------------------------------------------------------------------------------------------------------------------------------------------------------------------------------------------------------------------------------------------------------------------------------------------------------------------------|-----------------------------------------------------------------------------------------------------------------------------------------------------------------------------------------------------------------------------------------------------------------------------------------------------------------------|
|                |                                              | <ul style="list-style-type: none"> <li>• Digoxin</li> </ul> <p>Rhythm Control</p> <ul style="list-style-type: none"> <li>• Disopyramide</li> <li>• Quinidine</li> <li>• Amiodarone</li> <li>• Dronedarone</li> </ul> <p>Anticoagulants</p> <ul style="list-style-type: none"> <li>• Factor Xa inhibitors</li> </ul><br><ul style="list-style-type: none"> <li>• Direct Thrombin Inhibitor</li> </ul> | <ul style="list-style-type: none"> <li>• Pgp inhibition</li> </ul><br><ul style="list-style-type: none"> <li>• CYP 3A4 induction</li> </ul><br><ul style="list-style-type: none"> <li>• Inhibition of multiple clotting pathways</li> </ul><br><ul style="list-style-type: none"> <li>• Inhibition of multiple clotting pathways</li> </ul> | <ul style="list-style-type: none"> <li>• [↑] digoxin</li> </ul><br><ul style="list-style-type: none"> <li>• [↓] rhythm controlling medications</li> </ul><br><ul style="list-style-type: none"> <li>• ↑ anticoagulant effect</li> </ul><br><ul style="list-style-type: none"> <li>• ↑ anticoagulant effect</li> </ul> |
| Erlotinib      | Metastatic NSCLC and pancreatic cancer       | <p>Anticoagulants</p> <ul style="list-style-type: none"> <li>• Warfarin</li> </ul>                                                                                                                                                                                                                                                                                                                   | <ul style="list-style-type: none"> <li>• Unknown</li> </ul>                                                                                                                                                                                                                                                                                 | <ul style="list-style-type: none"> <li>• ↑ anticoagulant effect</li> </ul>                                                                                                                                                                                                                                            |
| Etoposide      | Small cell lung cancer and testicular cancer | <p>Anticoagulants</p> <ul style="list-style-type: none"> <li>• Warfarin</li> </ul>                                                                                                                                                                                                                                                                                                                   | <ul style="list-style-type: none"> <li>• CYP 2C8 and CYP 3A4 inhibition</li> </ul>                                                                                                                                                                                                                                                          | <ul style="list-style-type: none"> <li>• ↑ anticoagulant effect</li> </ul>                                                                                                                                                                                                                                            |
| 5-Fluorouracil | Various GI malignancies                      | <p>Anticoagulants</p> <ul style="list-style-type: none"> <li>• Warfarin</li> </ul>                                                                                                                                                                                                                                                                                                                   | <ul style="list-style-type: none"> <li>• CYP 2C9 inhibition</li> </ul>                                                                                                                                                                                                                                                                      | <ul style="list-style-type: none"> <li>• ↑ anticoagulant effect</li> </ul>                                                                                                                                                                                                                                            |
| Gemcitabine    | Pancreatic, NSCLC and ovarian cancer         | <p>Anticoagulant</p> <ul style="list-style-type: none"> <li>• Warfarin</li> </ul>                                                                                                                                                                                                                                                                                                                    | <ul style="list-style-type: none"> <li>• Unknown</li> </ul>                                                                                                                                                                                                                                                                                 | <ul style="list-style-type: none"> <li>• ↑ anticoagulant effect</li> </ul>                                                                                                                                                                                                                                            |

Data Supplement

Fradley et al Recognition, Prevention, and Management of Arrhythmias and Autonomic Disorders in Cardio-Oncology: A Scientific Statement From the American Heart Association

|              |                               |                                                                                                                                                                                                                           |                                                                                                      |                                                                                                                                                  |
|--------------|-------------------------------|---------------------------------------------------------------------------------------------------------------------------------------------------------------------------------------------------------------------------|------------------------------------------------------------------------------------------------------|--------------------------------------------------------------------------------------------------------------------------------------------------|
| Gilteritinib | AML                           | Rate Control <ul style="list-style-type: none"> <li>• Non-dihydropyridine CCB</li> </ul>                                                                                                                                  | <ul style="list-style-type: none"> <li>• CYP 3A4 inhibition</li> </ul>                               | <ul style="list-style-type: none"> <li>• [↑] gilteritinib</li> </ul>                                                                             |
| Idelalisib   | CLL and follicular lymphoma   | Rate Control <ul style="list-style-type: none"> <li>• Non-dihydropyridine CCB</li> </ul><br>Rhythm Control <ul style="list-style-type: none"> <li>• Disopyramide</li> <li>• Quinidine</li> <li>• Dronedarone</li> </ul>   | <ul style="list-style-type: none"> <li>• CYP 3A4 inhibition</li> <li>• CYP 3A4 inhibition</li> </ul> | <ul style="list-style-type: none"> <li>• [↑] CCB concentration/enhanced bradycardia</li> <li>• [↑] rhythm controlling medications</li> </ul>     |
| Ifosfamide   | Testicular and ovarian cancer | Rate Control <ul style="list-style-type: none"> <li>• Verapamil</li> </ul><br>Anticoagulants <ul style="list-style-type: none"> <li>• Warfarin</li> </ul>                                                                 | <ul style="list-style-type: none"> <li>• CYP 3A4 inhibition</li> <li>• Unknown</li> </ul>            | <ul style="list-style-type: none"> <li>• ↓ metabolism of ifosfamide</li> <li>• ↑ anticoagulant effect</li> </ul>                                 |
| Imatinib     | CML                           | Rate Control <ul style="list-style-type: none"> <li>• Carvedilol</li> <li>• Metoprolol</li> <li>• Propranolol</li> </ul><br><ul style="list-style-type: none"> <li>• Non-dihydropyridine CCB</li> </ul><br>Rhythm Control | <ul style="list-style-type: none"> <li>• CYP 2D6 inhibition</li> <li>• CYP 3A4 inhibition</li> </ul> | <ul style="list-style-type: none"> <li>• [↑] beta blocker/enhanced bradycardia</li> <li>• [↑] imatinib</li> <li>• [↑] antiarrhythmics</li> </ul> |



Data Supplement

Fradley et al Recognition, Prevention, and Management of Arrhythmias and Autonomic Disorders in Cardio-Oncology: A Scientific Statement From the American Heart Association

|              |                                                  |                                                                                                                                                                                                                                                                                                                                                        |                                                                                                                                 |                                                                                                                                                                  |
|--------------|--------------------------------------------------|--------------------------------------------------------------------------------------------------------------------------------------------------------------------------------------------------------------------------------------------------------------------------------------------------------------------------------------------------------|---------------------------------------------------------------------------------------------------------------------------------|------------------------------------------------------------------------------------------------------------------------------------------------------------------|
|              |                                                  | <ul style="list-style-type: none"> <li>• Class 1C Agents</li> </ul> <p>Anticoagulant</p> <ul style="list-style-type: none"> <li>• Warfarin</li> </ul>                                                                                                                                                                                                  | <ul style="list-style-type: none"> <li>• CYP 2D6 inhibition</li> <li>• CYP 3A4 and CYP 2C9 inhibition</li> </ul>                | <ul style="list-style-type: none"> <li>• ↑ anticoagulant effect</li> </ul>                                                                                       |
| Lenalidomide | Multiple myeloma and various B cell malignancies | <p>Rate Control</p> <ul style="list-style-type: none"> <li>• Digoxin</li> </ul>                                                                                                                                                                                                                                                                        | <ul style="list-style-type: none"> <li>• Pgp interactions</li> </ul>                                                            | <ul style="list-style-type: none"> <li>• [↑] digoxin</li> </ul>                                                                                                  |
| Mitotane     | Adrenocortical carcinoma                         | <p>Rate Control</p> <ul style="list-style-type: none"> <li>• Bisoprolol</li> <li>• Non-dihydropyridine CCB</li> </ul> <p>Rhythm Control</p> <ul style="list-style-type: none"> <li>• Disopyramide</li> <li>• Quinidine</li> <li>• Amiodarone</li> </ul> <p>Anticoagulants</p> <ul style="list-style-type: none"> <li>• Factor Xa inhibitors</li> </ul> | <ul style="list-style-type: none"> <li>• CYP 3A4 induction</li> <li>• CYP 3A4 induction</li> <li>• CYP 3A4 induction</li> </ul> | <ul style="list-style-type: none"> <li>• [↓] rate controlling medications</li> <li>• [↓] rhythm controlling medications</li> <li>• [↓] anticoagulants</li> </ul> |
| Neratinib    | HER2+ breast cancer                              | <p>Rate Control</p>                                                                                                                                                                                                                                                                                                                                    |                                                                                                                                 | <ul style="list-style-type: none"> <li>• [↑] neratinib</li> </ul>                                                                                                |

Data Supplement

Fradley et al Recognition, Prevention, and Management of Arrhythmias and Autonomic Disorders in Cardio-Oncology: A Scientific Statement From the American Heart Association

|              |                             |                                                                                                                                                                                                                                                                                  |                                                                                                                                                                     |                                                                                                                                                                         |
|--------------|-----------------------------|----------------------------------------------------------------------------------------------------------------------------------------------------------------------------------------------------------------------------------------------------------------------------------|---------------------------------------------------------------------------------------------------------------------------------------------------------------------|-------------------------------------------------------------------------------------------------------------------------------------------------------------------------|
|              |                             | <ul style="list-style-type: none"> <li>• Non-dihydropyridine CCB</li> <li>• Carvedilol</li> <li>• Verapamil</li> <li>• Digoxin</li> </ul> <p>Rhythm Control</p> <ul style="list-style-type: none"> <li>• Dronedarone</li> </ul>                                                  | <ul style="list-style-type: none"> <li>• CYP 3A4 inhibition</li> <li>• Pgp inhibition</li> <li>• Pgp interaction</li> <li>• CYP 3A4 and Pgp inhibition</li> </ul>   | <ul style="list-style-type: none"> <li>• [↑] neratinib</li> <li>• [↑] digoxin</li> <li>• [↑] neratinib</li> </ul>                                                       |
| Obinutuzumab | CLL and follicular lymphoma | <p>Rate Control</p> <ul style="list-style-type: none"> <li>• Beta blockers</li> <li>• Non-dihydropyridine CCB</li> </ul> <p>Anticoagulants</p> <ul style="list-style-type: none"> <li>• Factor Xa inhibitors</li> <li>• Direct Thrombin Inhibitor</li> <li>• Warfarin</li> </ul> | <ul style="list-style-type: none"> <li>• Unknown</li> <li>• Inhibition of multiple clotting pathways</li> <li>• Inhibition of multiple clotting pathways</li> </ul> | <ul style="list-style-type: none"> <li>• ↑ bradycardia</li> <li>• ↑ anticoagulant effect</li> <li>• ↑ anticoagulant effect</li> <li>• ↑ anticoagulant effect</li> </ul> |

Data Supplement

Fradley et al Recognition, Prevention, and Management of Arrhythmias and Autonomic Disorders in Cardio-Oncology: A Scientific Statement From the American Heart Association

|              |                                                        |                                                                                                                                                                                                                                           |                                                                                                      |                                                                                                                               |
|--------------|--------------------------------------------------------|-------------------------------------------------------------------------------------------------------------------------------------------------------------------------------------------------------------------------------------------|------------------------------------------------------------------------------------------------------|-------------------------------------------------------------------------------------------------------------------------------|
|              |                                                        |                                                                                                                                                                                                                                           | <ul style="list-style-type: none"> <li>• Inhibition of multiple clotting pathways</li> </ul>         |                                                                                                                               |
| Olaparib     | Metastatic BRCA+ breast cancer                         | <p>Rate Control</p> <ul style="list-style-type: none"> <li>• Non-dihydropyridine CCB</li> </ul> <p>Rhythm Control</p> <ul style="list-style-type: none"> <li>• Dronedarone</li> </ul>                                                     | <ul style="list-style-type: none"> <li>• CYP 3A4 inhibition</li> <li>• CYP 3A4 inhibition</li> </ul> | <ul style="list-style-type: none"> <li>• [↑] olaparib</li> <li>• [↑] olaparib</li> </ul>                                      |
| Panobinostat | Multiple myeloma                                       | <p>Rate Control</p> <ul style="list-style-type: none"> <li>• Carvedilol</li> <li>• Metoprolol</li> <li>• Propranolol</li> </ul> <p>Rhythm Control</p> <ul style="list-style-type: none"> <li>• Class 1C Agents</li> </ul>                 | <ul style="list-style-type: none"> <li>• CYP 2D6 inhibition</li> <li>• CYP 2D6 inhibition</li> </ul> | <ul style="list-style-type: none"> <li>• [↑] beta blocker/enhanced bradycardia</li> <li>• [↑] antiarrhythmic drugs</li> </ul> |
| Pazopanib    | Advanced renal cell carcinoma and soft tissue sarcomas | <p>Rate Control</p> <ul style="list-style-type: none"> <li>• Carvedilol</li> <li>• Verapamil</li> </ul> <p>Rhythm Control</p> <ul style="list-style-type: none"> <li>• Quinidine</li> <li>• Propafenone</li> <li>• Dronedarone</li> </ul> | <ul style="list-style-type: none"> <li>• Pgp inhibition</li> <li>• Pgp inhibition</li> </ul>         | <ul style="list-style-type: none"> <li>• [↑] pazopanib</li> <li>• [↑] pazopanib</li> </ul>                                    |
| Regorafenib  | Metastatic colorectal cancer, hepatocellular           | <p>Rate Control</p> <ul style="list-style-type: none"> <li>• Beta blockers</li> <li>• Non-</li> </ul>                                                                                                                                     | <ul style="list-style-type: none"> <li>• Unknown</li> </ul>                                          | <ul style="list-style-type: none"> <li>• ↑ bradycardia</li> </ul>                                                             |

Data Supplement

Fradley et al Recognition, Prevention, and Management of Arrhythmias and Autonomic Disorders in Cardio-Oncology: A Scientific Statement From the American Heart Association

|             |                                         |                                                                                                                                                                                                                                                     |                                                                                                             |                                                                                                |
|-------------|-----------------------------------------|-----------------------------------------------------------------------------------------------------------------------------------------------------------------------------------------------------------------------------------------------------|-------------------------------------------------------------------------------------------------------------|------------------------------------------------------------------------------------------------|
|             | carcinoma and GIST tumors               | <p>dihydropyridine CCB<br/>Digoxin</p> <p>Rhythm Control</p> <ul style="list-style-type: none"> <li>• Sotalol</li> </ul>                                                                                                                            | <ul style="list-style-type: none"> <li>• Unknown</li> </ul>                                                 | <ul style="list-style-type: none"> <li>• ↑ bradycardia</li> </ul>                              |
| Romidepsin  | T-cell lymphoma                         | <p>Anticoagulant</p> <ul style="list-style-type: none"> <li>• Warfarin</li> </ul>                                                                                                                                                                   | <ul style="list-style-type: none"> <li>• Unknown</li> </ul>                                                 | <ul style="list-style-type: none"> <li>• ↑ anticoagulant effect</li> </ul>                     |
| Ruxolitinib | Myelofibrosis                           | <p>Rate Control</p> <ul style="list-style-type: none"> <li>• Beta blockers;<br/>non-dihydropyridine CCB<br/>Digoxin</li> </ul> <p>Rhythm Control</p> <ul style="list-style-type: none"> <li>• Propafenone<br/>Amiodarone<br/>Dronedarone</li> </ul> | <ul style="list-style-type: none"> <li>• Unknown</li> <li>• Unknown</li> </ul>                              | <ul style="list-style-type: none"> <li>• ↑ bradycardia</li> <li>• ↑ bradycardia</li> </ul>     |
| Sorafenib   | Renal cell and hepatocellular carcinoma | <p>Anticoagulant</p> <ul style="list-style-type: none"> <li>• Warfarin</li> </ul>                                                                                                                                                                   | <ul style="list-style-type: none"> <li>• CYP 2C9 inhibition</li> </ul>                                      | <ul style="list-style-type: none"> <li>• ↑ anticoagulant effect</li> </ul>                     |
| Talazoparib | BRCA+ breast cancer                     | <p>Rate Control</p> <ul style="list-style-type: none"> <li>• Beta blockers<br/>Non-dihydropyridine CCB</li> </ul> <p>Rhythm Control</p>                                                                                                             | <ul style="list-style-type: none"> <li>• Unknown, possibly Pgp related</li> <li>• Pgp inhibition</li> </ul> | <ul style="list-style-type: none"> <li>• [↑] talazoparib</li> <li>• [↑] talazoparib</li> </ul> |

Data Supplement

Fradley et al Recognition, Prevention, and Management of Arrhythmias and Autonomic Disorders in Cardio-Oncology: A Scientific Statement From the American Heart Association

|             |                                                |                                                                                                                                                                                                                            |                                                                                                   |                                                                                                   |
|-------------|------------------------------------------------|----------------------------------------------------------------------------------------------------------------------------------------------------------------------------------------------------------------------------|---------------------------------------------------------------------------------------------------|---------------------------------------------------------------------------------------------------|
|             |                                                | <ul style="list-style-type: none"> <li>• Quinidine</li> <li>• Propafenone</li> <li>• Amiodarone</li> </ul>                                                                                                                 |                                                                                                   |                                                                                                   |
| Tamoxifen   | Breast cancer                                  | Anticoagulant <ul style="list-style-type: none"> <li>• Warfarin</li> </ul>                                                                                                                                                 | <ul style="list-style-type: none"> <li>• CYP 2C9 inhibition</li> </ul>                            | <ul style="list-style-type: none"> <li>• ↑ anticoagulant effect</li> </ul>                        |
| Topotecan   | Various cancers including cervical and ovarian | Rate Control <ul style="list-style-type: none"> <li>• Carvedilol</li> <li>• Verapamil</li> </ul> Rhythm Control <ul style="list-style-type: none"> <li>• Quinidine</li> <li>• Propafenone</li> <li>• Amiodarone</li> </ul> | <ul style="list-style-type: none"> <li>• Pgp inhibition</li> <li>• Pgp inhibition</li> </ul>      | <ul style="list-style-type: none"> <li>• [↑] topotecan</li> <li>• [↑] topotecan</li> </ul>        |
| Vandetanib  | Medullary thyroid cancer                       | Rate Control <ul style="list-style-type: none"> <li>• Digoxin</li> </ul>                                                                                                                                                   | <ul style="list-style-type: none"> <li>• Pgp interaction</li> </ul>                               | <ul style="list-style-type: none"> <li>• [↑] digoxin</li> </ul>                                   |
| Vemurafenib | Advanced melanoma and NSCLC                    | Rate Control <ul style="list-style-type: none"> <li>• Digoxin</li> </ul> Anticoagulant <ul style="list-style-type: none"> <li>• Warfarin</li> </ul>                                                                        | <ul style="list-style-type: none"> <li>• Pgp interaction</li> <li>• CYP 2C9 inhibition</li> </ul> | <ul style="list-style-type: none"> <li>• [↑] digoxin</li> <li>• ↑ anticoagulant effect</li> </ul> |
| Venetoclax  | CLL and mantle cell lymphoma                   | Rate Control <ul style="list-style-type: none"> <li>• Carvedilol</li> <li>• Verapmail</li> </ul> <ul style="list-style-type: none"> <li>• Digoxin</li> </ul>                                                               | <ul style="list-style-type: none"> <li>• Pgp inhibition</li> <li>• Pgp inhibition</li> </ul>      | <ul style="list-style-type: none"> <li>• [↑] venetoclax</li> <li>• [↑] digoxin</li> </ul>         |

Data Supplement

Fradley et al Recognition, Prevention, and Management of Arrhythmias and Autonomic Disorders in Cardio-Oncology: A Scientific Statement From the American Heart Association

|             |                                                   |                                                                                                                                                                                                                              |                                                                                                                     |                                                                                                                                |
|-------------|---------------------------------------------------|------------------------------------------------------------------------------------------------------------------------------------------------------------------------------------------------------------------------------|---------------------------------------------------------------------------------------------------------------------|--------------------------------------------------------------------------------------------------------------------------------|
|             |                                                   | <p>Rhythm Control</p> <ul style="list-style-type: none"> <li>• Quinidine;<br/>Propafenone<br/>Amiodarone</li> <li>• Dronedarone</li> </ul> <p>Anticoagulant</p> <ul style="list-style-type: none"> <li>• Warfarin</li> </ul> | <ul style="list-style-type: none"> <li>• Pgp inhibition</li> <li>• CYP 3A4 inhibition</li> <li>• Unknown</li> </ul> | <ul style="list-style-type: none"> <li>• [↑] venetoclax</li> <li>• [↑] venetoclax</li> <li>• ↑ anticoagulant effect</li> </ul> |
| Vincristine | Various cancers including leukemias and lymphomas | <p>Rate Control</p> <ul style="list-style-type: none"> <li>• Carvedilol<br/>Verapamil</li> </ul> <p>Rhythm Control</p> <ul style="list-style-type: none"> <li>• Quinidine<br/>Propafenone</li> </ul>                         | <ul style="list-style-type: none"> <li>• Pgp inhibition</li> <li>• Pgp inhibition</li> </ul>                        | <ul style="list-style-type: none"> <li>• [↑] vincristine</li> <li>• [↑] vincristine</li> </ul>                                 |

AML = acute myeloid leukemia; BTK = Bruton’s Tyrosine Kinase; CCB = calcium channel blocker; CDK = cyclin dependent kinase; CLL = chronic lymphocytic leukemia; CML = chronic myeloid leukemia; GI = gastrointestinal; GIST = gastrointestinal stromal tumor; NSCLC = non-small cell lung cancer; Pgp = P-glycoprotein/ ABCB1 Inhibition; [↑] = increased concentration; [↓] = decreased concentration; ↑ = increased; ↓ = decreased

**Table II. Frequency of ECG Monitoring**

| <b>Drug Type</b>                  | <b>Risk Level*</b> | <b>Indications for ECG Evaluation**</b>                             |
|-----------------------------------|--------------------|---------------------------------------------------------------------|
| <b>Antimetabolites</b>            |                    |                                                                     |
| Fluorouracil                      | Rare               | Pre-treatment<br>Dose Adjustments<br>As Clinically Indicated        |
| Capecitabine                      | Frequent           | Pre-treatment<br>Dose Adjustments<br>As Clinically Indicated        |
| <b>Purine analogs</b>             |                    |                                                                     |
| Fludarabine                       | Rare               | Pre-treatment<br>Dose Adjustments<br>As Clinically Indicated        |
| <b>Antimicrotubule agents</b>     |                    |                                                                     |
| Paclitaxel                        | Rare               | Conduction Abnormalities During Infusion<br>As Clinically Indicated |
| <b>Tyrosine kinase inhibitors</b> |                    |                                                                     |
| Afatinib                          | Rare               | Pre-treatment<br>Dose Adjustments<br>As Clinically Indicated        |
| Aflibercept                       | Rare               | Pre-treatment<br>Dose Adjustments<br>As Clinically Indicated        |

Data Supplement

Fradley et al Recognition, Prevention, and Management of Arrhythmias and Autonomic Disorders in Cardio-Oncology: A Scientific Statement From the American Heart Association

|            |          |                                                                                                                                |
|------------|----------|--------------------------------------------------------------------------------------------------------------------------------|
| Bosutinib  | Frequent | Pre-treatment<br>Dose Adjustments<br>As Clinically Indicated                                                                   |
| Ceritinib  | Rare     | Known CHF<br>Bradyarrhythmias<br>Electrolyte abnormalities<br>Concomitant QT prolonging medications<br>As Clinically Indicated |
| Crizotinib | Rare     | Known CHF<br>Bradyarrhythmias<br>Electrolyte abnormalities<br>Concomitant QT prolonging medications<br>As Clinically Indicated |
| Dasatinib  | Common   | Pre-treatment<br>Dose Adjustments<br>As Clinically Indicated                                                                   |
| Dovitinib  | Common   | Pre-treatment<br>Dose Adjustments<br>As Clinically Indicated                                                                   |
| Imatinib   | Rare     | Pre-treatment<br>Dose Adjustments<br>As Clinically Indicated                                                                   |
| Lapatinib  | Rare     | Monitor for QTc prolongation during treatment                                                                                  |
| Lenvatinib | Common   | Known CHF<br>Bradyarrhythmias<br>Congenital Long QT syndrome<br>As Clinically Indicated                                        |
| Nilotinib  | Rare     | Pre-treatment<br>7-days post initiation                                                                                        |



Data Supplement

Fradley et al Recognition, Prevention, and Management of Arrhythmias and Autonomic Disorders in Cardio-Oncology: A Scientific Statement From the American Heart Association

|                                       |        |                                                              |
|---------------------------------------|--------|--------------------------------------------------------------|
|                                       |        | Dose Adjustments<br>As Clinically Indicated                  |
| Nintedanib                            | Rare   | Pre-treatment<br>Dose Adjustments<br>As Clinically Indicated |
| Pazopanib                             | Rare   | Pre-treatment<br>As Clinically Indicated                     |
| Ponatinib                             | Rare   | Pre-treatment<br>Dose Adjustments<br>As Clinically Indicated |
| Sorafenib/ sunitinib                  | Common | Known CHF<br>Bradyarrhythmias<br>As Clinically Indicated     |
| Vandetanib                            | Common | Pre-treatment<br>Dose Adjustments<br>As Clinically Indicated |
| <b>Histone deacetylase inhibitors</b> |        |                                                              |
| Belinostat                            | Common | Pre-treatment<br>Dose Adjustments<br>As Clinically Indicated |
| Panobinostat                          | Rare   | Pre-treatment<br>Dose Adjustments<br>As Clinically Indicated |
| Romidepsin                            | Rare   | Pre-treatment<br>Dose Adjustments<br>As Clinically Indicated |

Data Supplement

Fradley et al Recognition, Prevention, and Management of Arrhythmias and Autonomic Disorders in Cardio-Oncology: A Scientific Statement From the American Heart Association

|                                                      |          |                                                              |
|------------------------------------------------------|----------|--------------------------------------------------------------|
| Vorinostat                                           | Frequent | Pre-treatment<br>Dose Adjustments<br>As Clinically Indicated |
| <b>Proteasome inhibitor</b>                          |          |                                                              |
| Bortezomib                                           | Rare     | CV Risk Factors<br>CV Disease<br>As Clinically Indicated     |
| <b>Vascular endothelial growth factor inhibitors</b> |          |                                                              |
| Cediranib                                            | Frequent | Pre-treatment<br>Dose Adjustments<br>As Clinically Indicated |
| <b>Antiangiogenic</b>                                |          |                                                              |
| Combretastatin (CA4P)                                | Frequent | Pre-treatment<br>Dose Adjustments<br>As Clinically Indicated |
| Vadimezan (ASA404)                                   | Frequent | Pre-treatment<br>Dose Adjustments<br>As Clinically Indicated |
| <b>Protein kinase C inhibitor</b>                    |          |                                                              |
| Enzastaurin                                          | Frequent | Pre-treatment<br>Dose Adjustments<br>As Clinically Indicated |
| <b>Monoclonal antibodies</b>                         |          |                                                              |
| Trastuzumab and Pertuzumab                           | Rare     | Pre-treatment<br>Dose Adjustments<br>As Clinically Indicated |

Data Supplement

Fradley et al Recognition, Prevention, and Management of Arrhythmias and Autonomic Disorders in Cardio-Oncology: A Scientific Statement From the American Heart Association

|                                                    |          |                                                                                                     |
|----------------------------------------------------|----------|-----------------------------------------------------------------------------------------------------|
|                                                    |          |                                                                                                     |
| <b>B-Raf inhibitor</b>                             |          |                                                                                                     |
| Vemurafenib                                        | Rare     | Pre-treatment<br>Monthly for first 3 months<br>Every 3 months thereafter<br>As Clinically Indicated |
| <b>Cyclin Dependent Kinase (CDK) 4/6 Inhibitor</b> |          |                                                                                                     |
| Ribociclib                                         | Frequent | Pre-treatment<br>Day 14 of cycle 1<br>Start of cycle 2<br>As Clinically Indicated                   |
| <b>Other</b>                                       |          |                                                                                                     |
| Arsenic trioxide                                   | Frequent | Pre-treatment<br>Dose Adjustments<br>As Clinically Indicated                                        |

\*Frequent (>10% incidence); Common (5%-10% incidence); and Rare (<1%-5% incidence).

\*\*From drug labels catalogued by the National Library of Medicine, <https://dailymed.nlm.nih.gov/dailymed/index.cfm>, as well as <https://www.rxlist.com>. For drugs without specific label recommendations, general recommendations have been provided.

CHF = congestive heart failure; CV = cardiovascular; ECG = electrocardiogram
